# Supplementary material for: Dual-Emissive Monoruthenium Complexes of N(CH3)-Bridged Ligand: Synthesis, Characterization, and Substituent Effect
Source: MDPI journal article supplement (doi:10.3390/ma16206792), 2023-10-20
Supplement: s1 [file s1]

## Supporting Information for

# Dual-Emissive Monoruthenium Complexes of N(CH<sub>3</sub>)-Bridged Ligand: Synthesis, Characterization, and Substituent Effect

*Si-Hai Wu,<sup>\*,†</sup> Zhe Zhang,<sup>†</sup> Ren-Hui Zheng,<sup>†</sup> Rong Yang,<sup>†</sup> Lianhui Wang,<sup>\*,†</sup>*

*Jiang-Yang Shao,<sup>‡</sup> Zhong-Liang Gong,<sup>\*,‡</sup> and Yu-Wu Zhong<sup>‡</sup>*

<sup>†</sup> School of Medicine, Huaqiao University, Quanzhou, Fujian 362021, China

<sup>‡</sup> CAS Key Laboratory of Photochemistry, CAS Research/Education Center for Excellence in Molecular Sciences, Institute of Chemistry, Chinese Academy of Sciences, Beijing 100190, China

\*To whom correspondence should be addressed. Email: wusihai@hqu.edu.cn; lianhui.wang@hqu.edu.cn; gongzhongliang@iccas.ac.cn

### Table of Contents

|                                                                                                                                                    |         |
|----------------------------------------------------------------------------------------------------------------------------------------------------|---------|
| NMR spectra of <b>L1</b> , <b>L3</b> , <b>1</b> (PF <sub>6</sub> ) <sub>2</sub> , and <b>3</b> (PF <sub>6</sub> ) <sub>2</sub>                     | S2–S5   |
| Mass spectra of <b>1</b> (PF <sub>6</sub> ) <sub>2</sub> , <b>2</b> (PF <sub>6</sub> ) <sub>2</sub> , and <b>3</b> (PF <sub>6</sub> ) <sub>2</sub> | S6      |
| HPLC spectra of complexes <b>1</b> (PF <sub>6</sub> ) <sub>2</sub> – <b>3</b> (PF <sub>6</sub> ) <sub>2</sub>                                      | S7      |
| Single-Crystal X-Ray data of complex <b>3</b> (PF <sub>6</sub> ) <sub>2</sub>                                                                      | S7      |
| Photophysical studies of these compounds                                                                                                           | S8–S10  |
| Electrochemical data of ligands <b>L1</b> – <b>L3</b>                                                                                              | S10     |
| DFT/TD-DFT calculation results of these complexes                                                                                                  | S11–S12 |

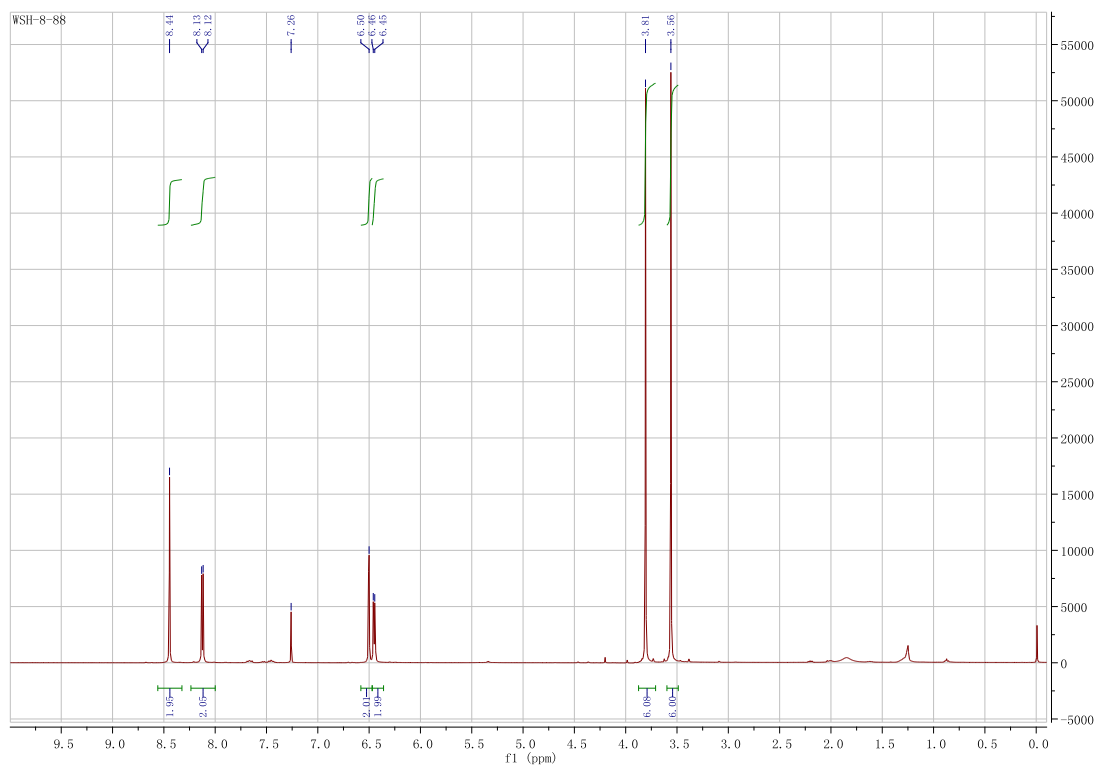

**Figure S1.**  $^1\text{H}$  NMR spectra of **L1** in  $\text{CDCl}_3$ .

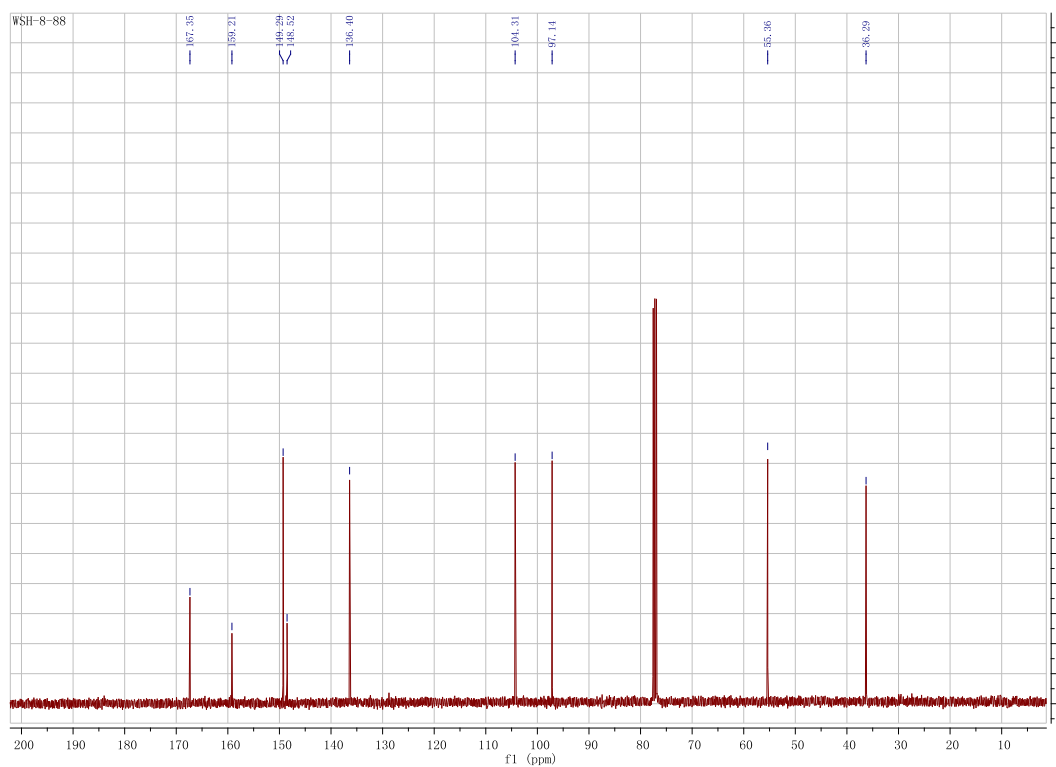

**Figure S2.**  $^{13}\text{C}$  NMR spectra of **L1** in  $\text{CDCl}_3$ .

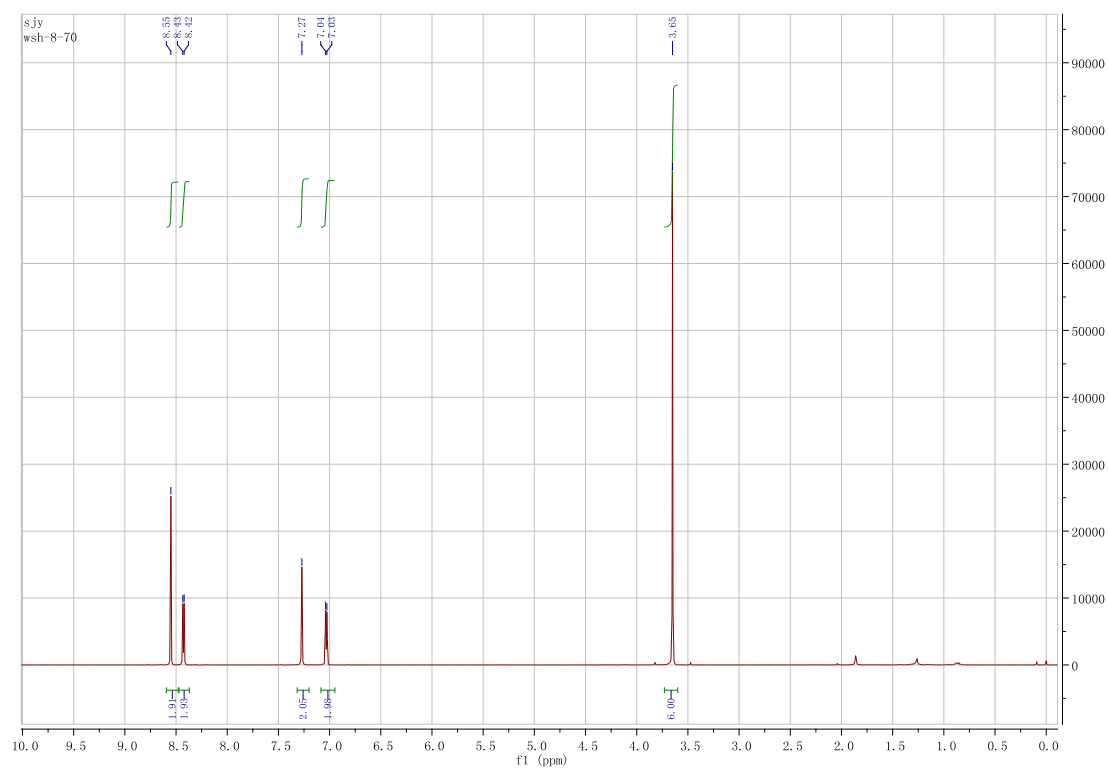

**Figure S3.** <sup>1</sup>H NMR spectra of L3 in CDCl<sub>3</sub>.

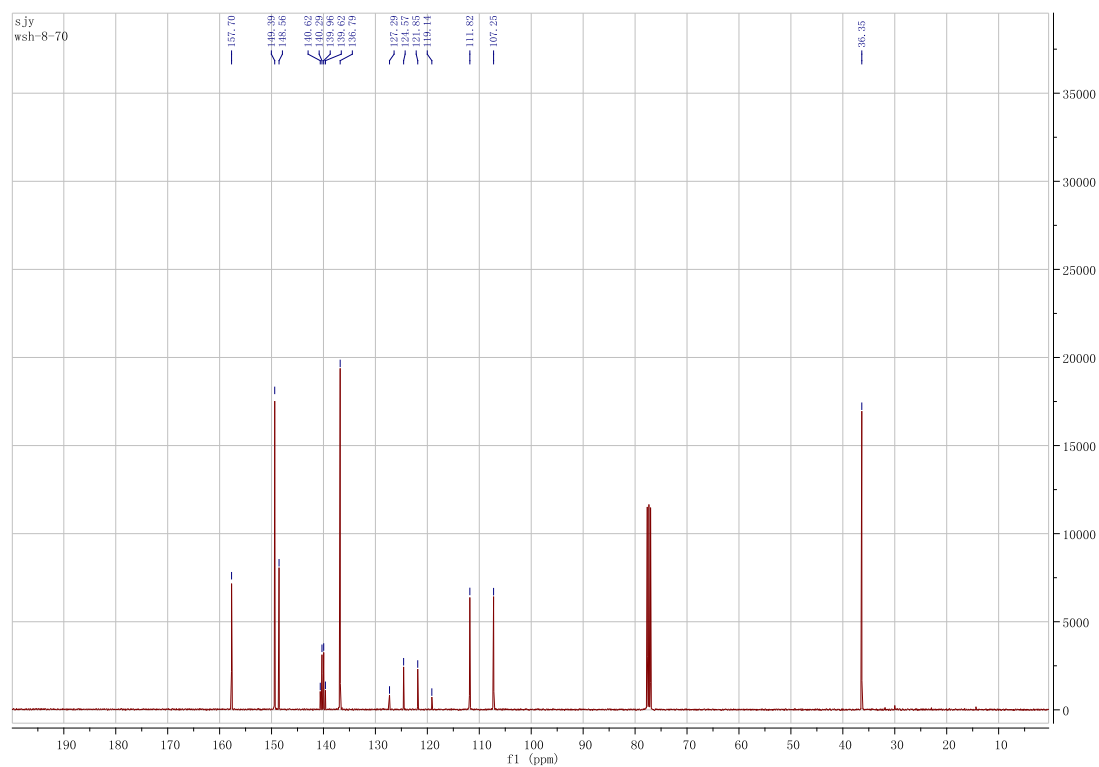

**Figure S4.** <sup>13</sup>C NMR spectra of L3 in CDCl<sub>3</sub>.

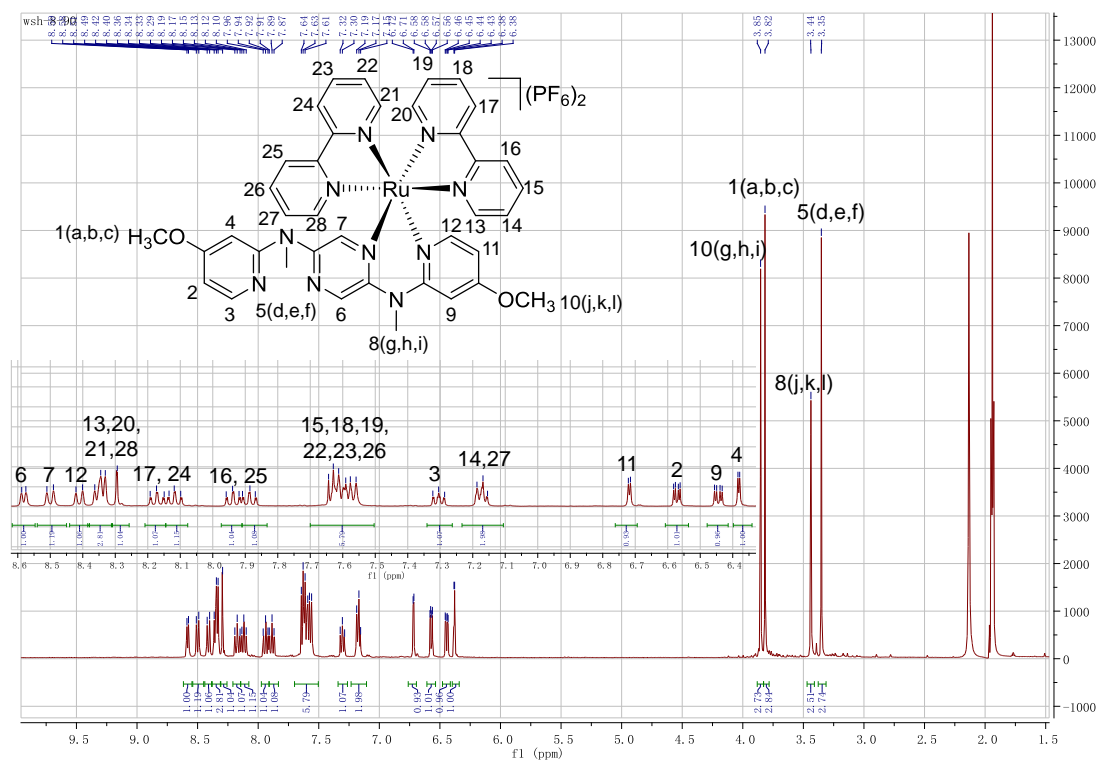

**Figure S5.**  $^1\text{H}$  NMR spectra of **1**(PF<sub>6</sub>)<sub>2</sub> in CD<sub>3</sub>CN.

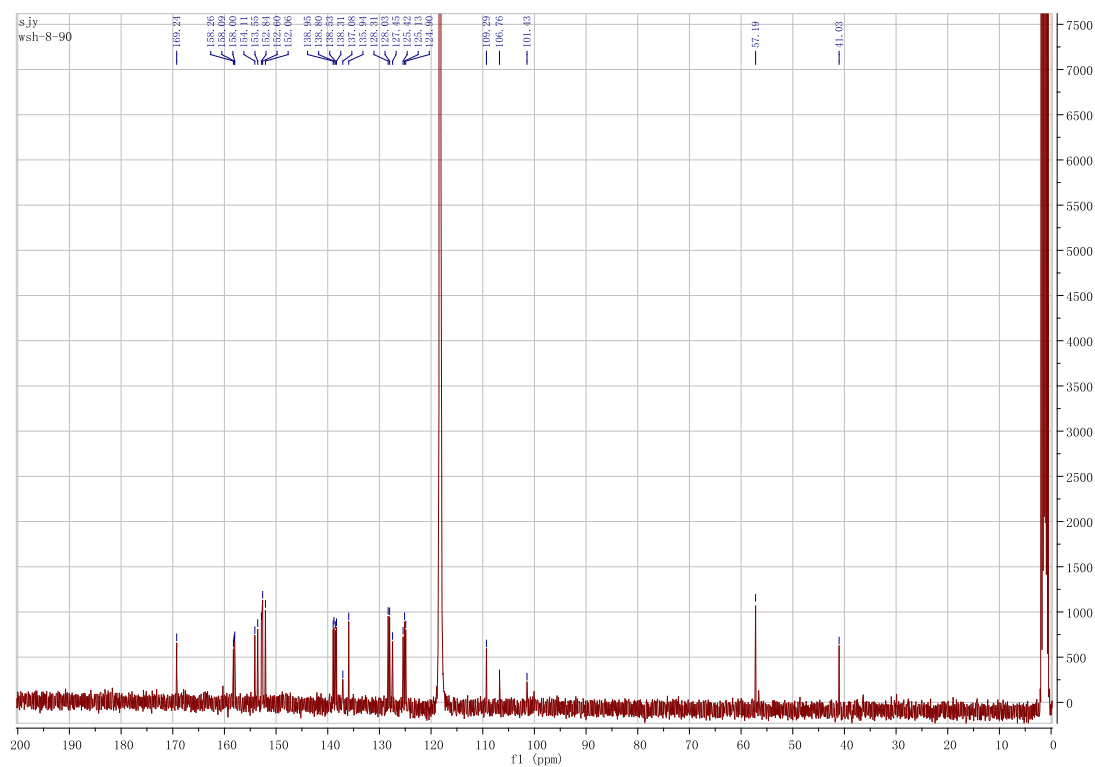

**Figure S6.**  $^{13}\text{C}$  NMR spectra of **1**(PF<sub>6</sub>)<sub>2</sub> in CD<sub>3</sub>CN.



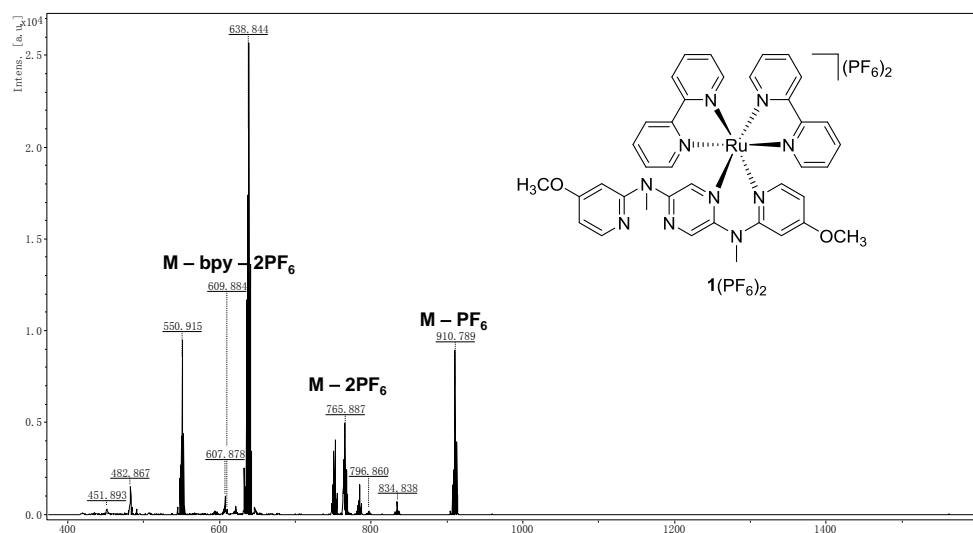

Figure S9. MADLI-TOF mass spectrum of  $1(\text{PF}_6)_2$ .

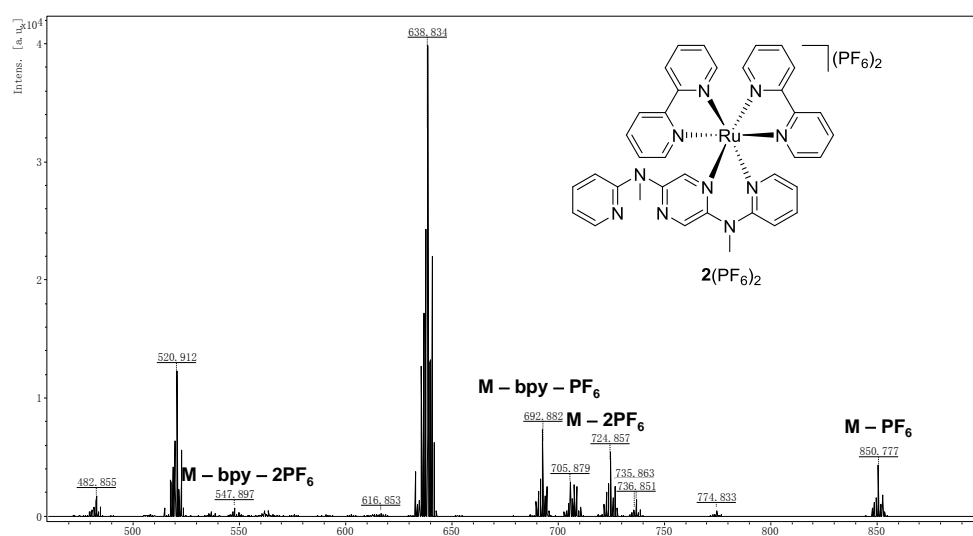

Figure S10. MADLI-TOF mass spectrum of  $2(\text{PF}_6)_2$ .

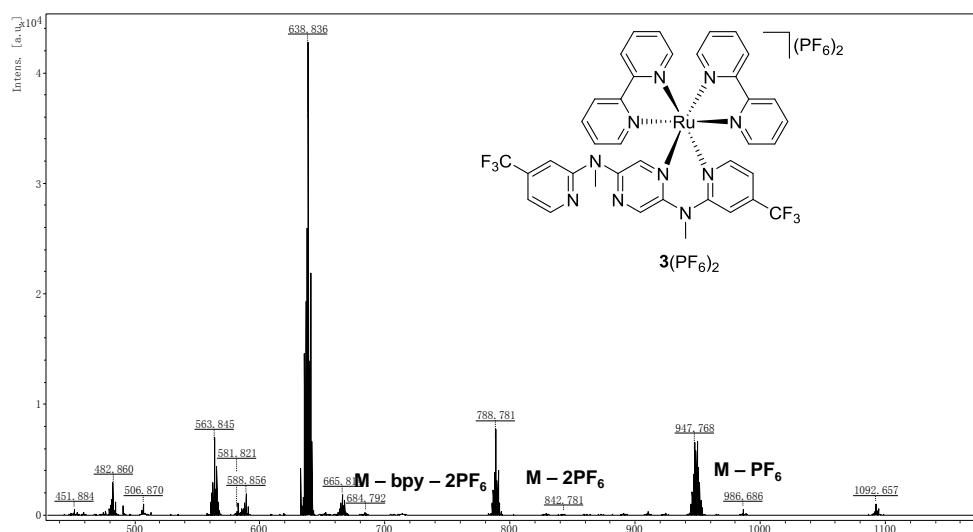

Figure S11. MADLI-TOF mass spectrum of  $3(\text{PF}_6)_2$ .

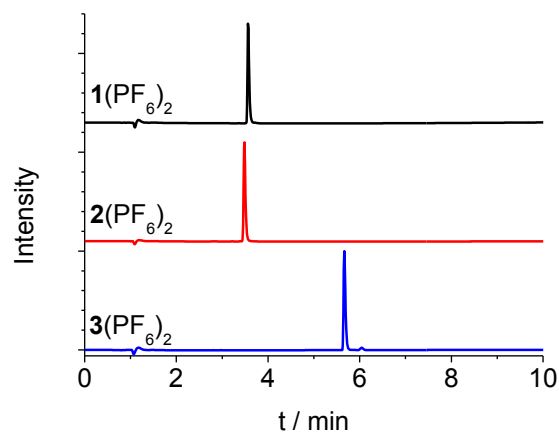

**Figure S12.** Analytical HPLC spectra of **1**(PF<sub>6</sub>)<sub>2</sub> (black line), **2**(PF<sub>6</sub>)<sub>2</sub> (red line), and **3**(PF<sub>6</sub>)<sub>2</sub> (blue line). The noise peaks around 1.1 s are due to eluent solvents.

**Table S1.** Single-crystal X-ray data of complex **3**(PF<sub>6</sub>)<sub>2</sub>.

| Compound                       | <b>3</b> (PF <sub>6</sub> ) <sub>2</sub>                                          |
|--------------------------------|-----------------------------------------------------------------------------------|
| CCDC number                    | 2107266                                                                           |
| Empirical formula              | C <sub>38</sub> H <sub>30</sub> F <sub>18</sub> N <sub>10</sub> P <sub>2</sub> Ru |
| Formula mass                   | 1131.73                                                                           |
| Crystal system                 | Triclinic                                                                         |
| <i>a</i> [Å]                   | 11.6715(4)                                                                        |
| <i>b</i> [Å]                   | 13.8183(4)                                                                        |
| <i>c</i> [Å]                   | 14.1803(4)                                                                        |
| <i>V</i> [Å <sup>3</sup> ]     | 2107.13(12)                                                                       |
| <i>α</i> [°]                   | 74.878(3)                                                                         |
| <i>β</i> [°]                   | 74.737(3)                                                                         |
| <i>γ</i> [°]                   | 78.194(2)                                                                         |
| <i>Z</i>                       | 2                                                                                 |
| Density [Mg·cm <sup>-3</sup> ] | 1.784                                                                             |
| <i>R</i> 1 (final)             | 0.0477                                                                            |
| <i>wR</i> 2 (final)            | 0.1105                                                                            |
| <i>R</i> 1 (all)               | 0.0585                                                                            |
| <i>wR</i> 2 (all)              | 0.1155                                                                            |

**Table S2.** Selected bond lengths (Å) and angles.

| Complex                                  | Bond lengths (Å) |          | Bond angles     |           |
|------------------------------------------|------------------|----------|-----------------|-----------|
| <b>3</b> (PF <sub>6</sub> ) <sub>2</sub> | Ru(1)–N(1)       | 2.056(3) | N(1)–Ru(1)–N(6) | 78.86(11) |
|                                          | Ru(1)–N(2)       | 2.078(3) | N(2)–Ru(1)–N(3) | 78.68(11) |
|                                          | Ru(1)–N(3)       | 2.062(3) | N(4)–Ru(1)–N(5) | 88.30(10) |
|                                          | Ru(1)–N(4)       | 2.068(3) | N(2)–Ru(1)–N(4) | 91.11(10) |
|                                          | Ru(1)–N(5)       | 2.099(3) | N(2)–Ru(1)–N(5) | 97.14(10) |
|                                          | Ru(1)–N(6)       | 2.071(3) | N(1)–Ru(1)–N(2) | 96.38(11) |

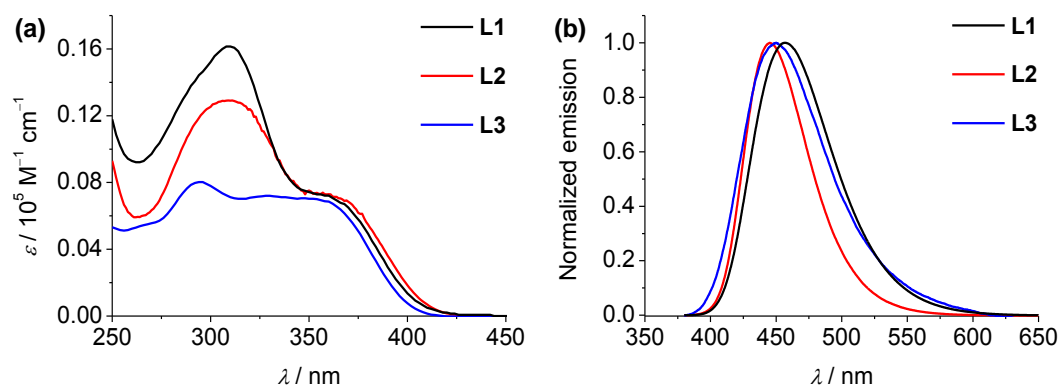

**Figure S13.** (a) UV/vis absorption spectra of ligand **L1**–**L3** in acetonitrile. (b) Emission spectra of ligand **L1**–**L3** in acetonitrile on excitation at 360 nm.

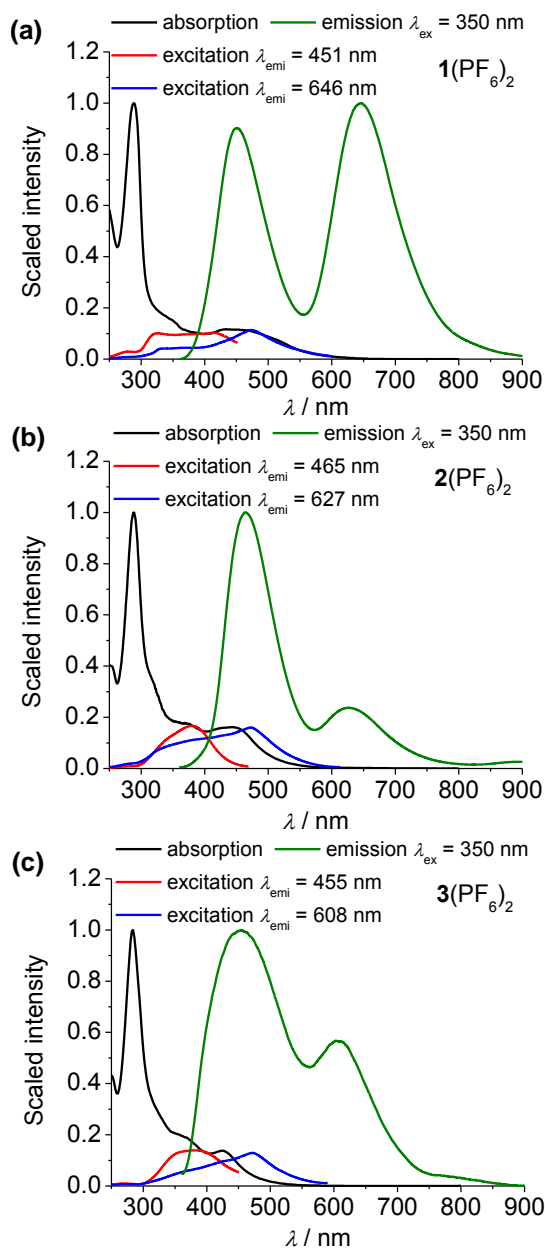

**Figure S14.** Absorption, excitation, and emission spectra of **1**(PF<sub>6</sub>)<sub>2</sub> (a), **2**(PF<sub>6</sub>)<sub>2</sub> (b), and **3**(PF<sub>6</sub>)<sub>2</sub> (c) in CH<sub>3</sub>CN.



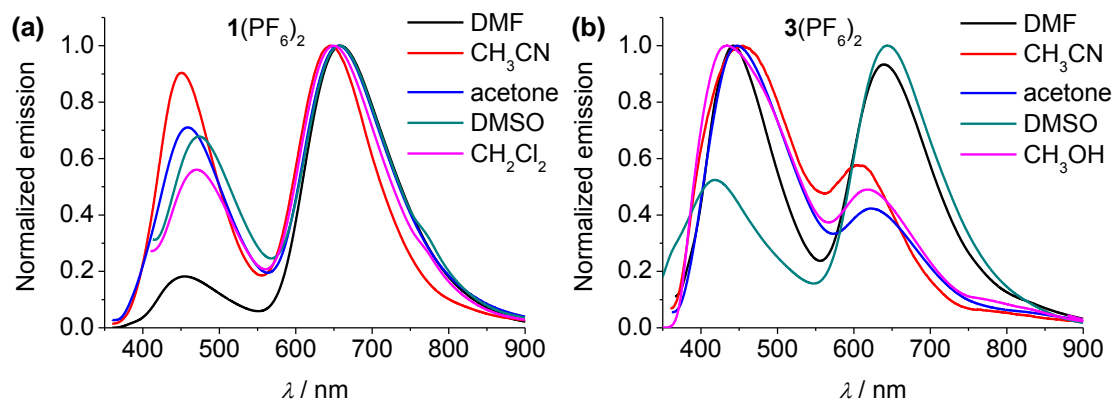

**Figure S15.** Normalized emission spectra changes of  $1(\text{PF}_6)_2$  (a) and  $3(\text{PF}_6)_2$  (b) in different solvents.

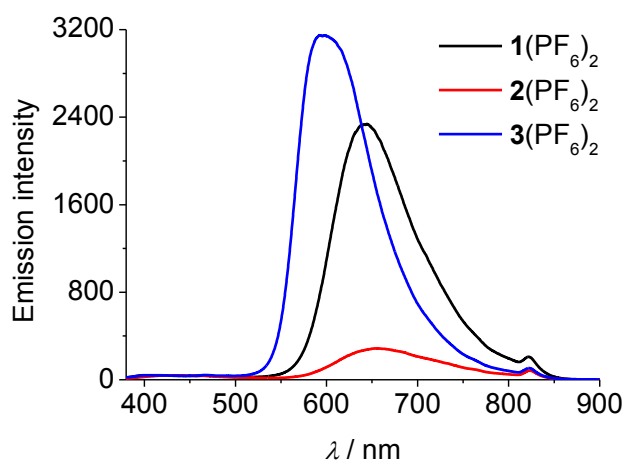

**Figure S16.** Emission spectra of  $1(\text{PF}_6)_2$  (a),  $2(\text{PF}_6)_2$  (b), and  $3(\text{PF}_6)_2$  (c) in solid state on excitation at 350 nm.

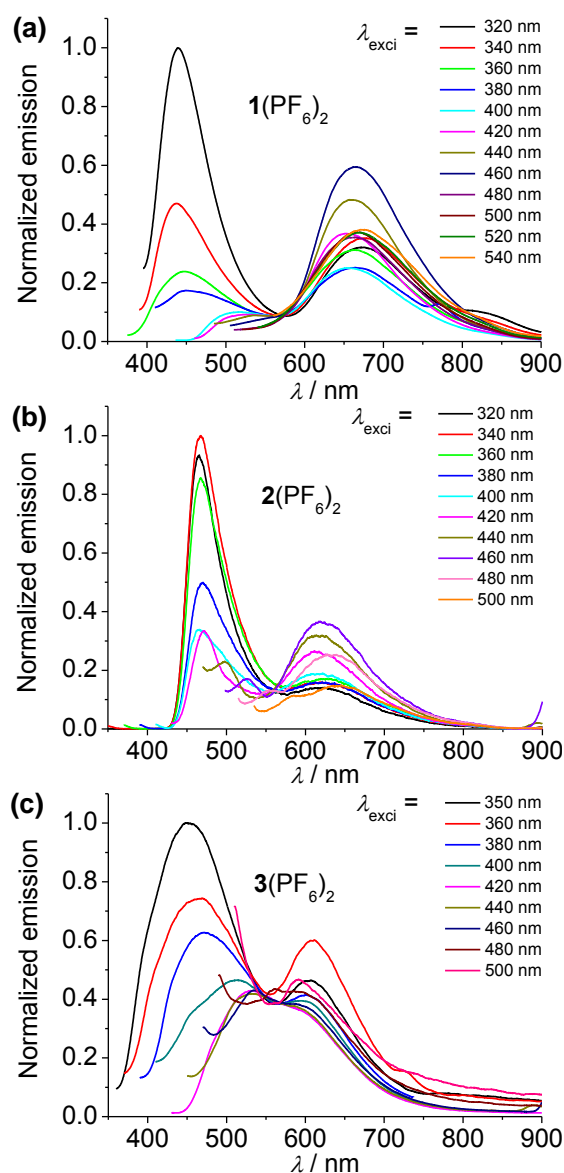

**Figure S17.** Emission spectra changes of **1**(PF<sub>6</sub>)<sub>2</sub> (a), **2**(PF<sub>6</sub>)<sub>2</sub> (b), and **3**(PF<sub>6</sub>)<sub>2</sub> (c) in CH<sub>3</sub>CN at different excitation wavelength.

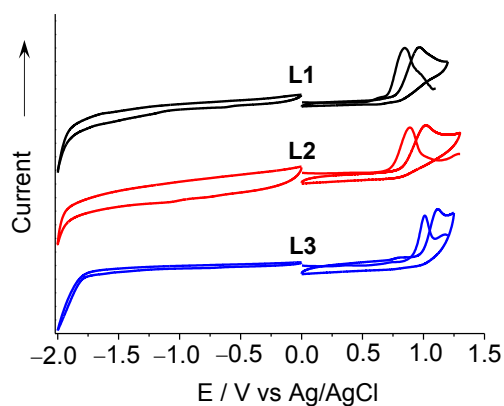

**Figure S18.** CVs and DPVs of ligands **L1**–**L3** in acetonitrile containing 0.1 M Bu<sub>4</sub>NClO<sub>4</sub> at a scan rate of 100 mV/s. The working electrode is a glassy carbon, the counter electrode is a Pt wire, and the reference electrode is Ag/AgCl in saturated aq. NaCl.

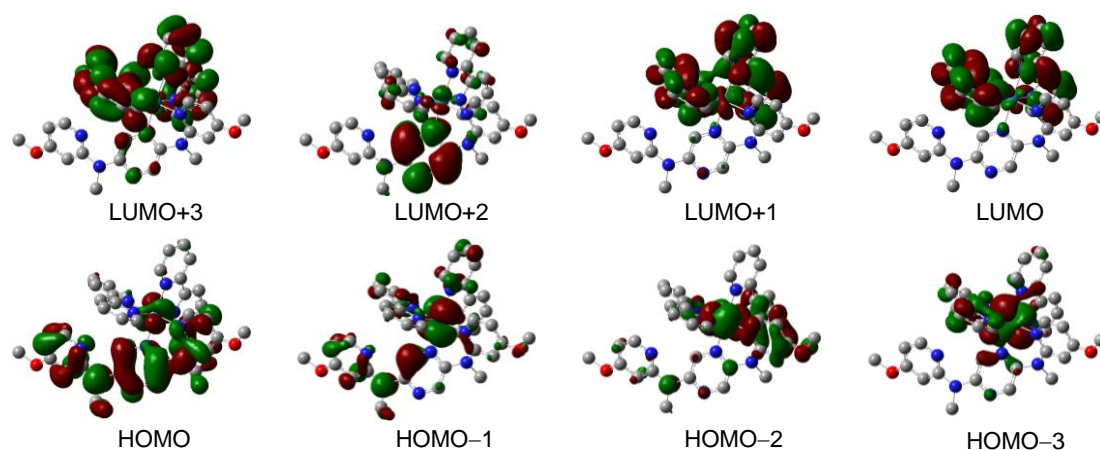

**Figure S19.** Isodensity plots of selected frontier molecular orbitals of complex  $1^{2+}$ . All orbitals were computed at an isovalue of  $0.02 \text{ e bohr}^{-3}$ .

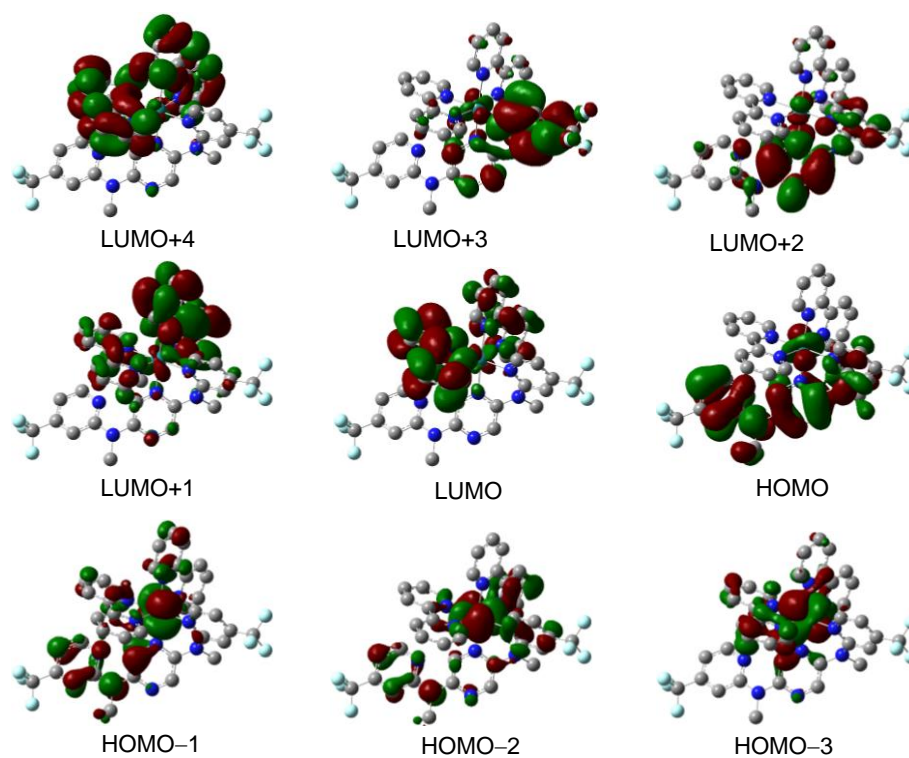

**Figure S20.** Isodensity plots of selected frontier molecular orbitals of complex  $3^{2+}$ . All orbitals were computed at an isovalue of  $0.02 \text{ e bohr}^{-3}$ .

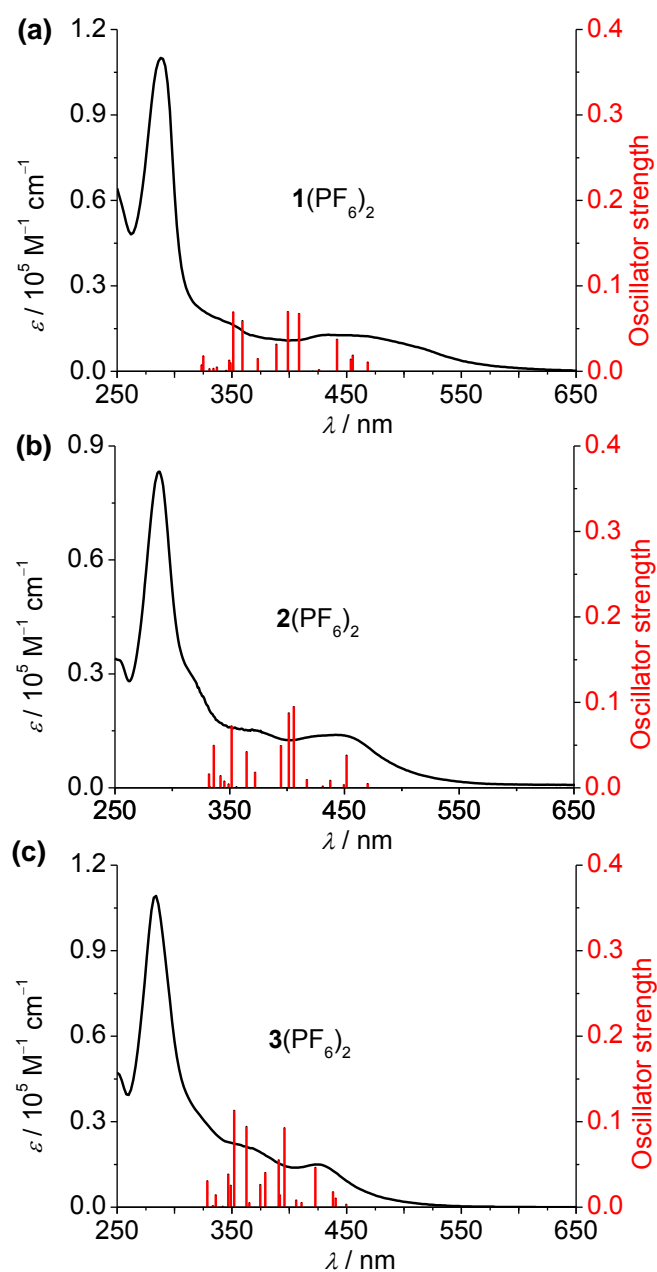

**Figure S21.** TDDFT-predicted excitations (red lines) of (a)  $1^{2+}$ , (b)  $2^{2+}$ , and (c)  $3^{2+}$ . The absorption spectra of  $1(\text{PF}_6)_2$ – $3(\text{PF}_6)_2$  (black curves) are included for comparison.
